# Supplementary material for: Diversity and distribution of the lanthanome in aerobic methane-oxidising bacteria
Source: Research Square preprint supplement (doi:10.21203/rs.3.rs-6350491/v1), 2025-05-22
Supplement: Supplementary file 1 [file 36043982ff1d50e88e7f50cf.xlsx]

## Sheet: Table_S1_Custom_database
Complete name with strain	Assembly Accession	Completeness	Contamination	Isolation source	ncbi.Domain	ncbi.Phylum	ncbi.Class	ncbi.Order	ncbi.Family	ncbi.Genus	ncbi.Species
Chromatiales bacterium USCg_Taylor	GCA_002007425.1	89.99	1.11	Near-surface active layer soil samples from the polygonal terrain	Bacteria	Pseudomonadota	Gammaproteobacteria	Chromatiales	unclassified Chromatiales
Beijerinckiaceae bacterium USCa_MF	GCA_002890675.1	86.85	2.7	forest soil collected in Oct 2013; Oct 2014; and Nov 2016	Bacteria	Pseudomonadota	Alphaproteobacteria	Hyphomicrobiales	Beijerinckiaceae	unclassified Beijerinckiaceae
Beijerinckiaceae bacterium MG08	GCA_004564215.1	99.06	0.31	subarctic landfill	Bacteria	Pseudomonadota	Alphaproteobacteria	Hyphomicrobiales	Beijerinckiaceae	unclassified Beijerinckiaceae
Methylococcus capsulatus str. Bath	GCF_000008325.1	99.2	0	not provided	Bacteria	Pseudomonadota	Gammaproteobacteria	Methylococcales	Methylococcaceae	Methylococcus	Methylococcus capsulatus
Methylacidiphilum infernorum V4	GCF_000019665.1	98.65	0.34	not provided	Bacteria	Verrucomicrobiota	Methylacidiphilae	Methylacidiphilales	Methylacidiphilaceae	Methylacidiphilum (ex Ratnadevi et al. 2023)	Candidatus Methylacidiphilum infernorum
Methylocella silvestris BL2	GCF_000021745.1	99.37	0	not provided	Bacteria	Pseudomonadota	Alphaproteobacteria	Hyphomicrobiales	Beijerinckiaceae	Methylocella	Methylocella silvestris
Methylocystis sp. ATCC 49242	GCF_000188155.2	99.68	0.86	aquifer (aquifer; Canoga Park)	Bacteria	Pseudomonadota	Alphaproteobacteria	Hyphomicrobiales	Methylocystaceae	Methylocystis	unclassified Methylocystis
Methylobacter tundripaludum SV96	GCF_000190755.2	99.37	1.59	arctic wetland soil	Bacteria	Pseudomonadota	Gammaproteobacteria	Methylococcales	Methylococcaceae	Methylobacter	Methylobacter tundripaludum
Methylomicrobium album BG8	GCF_000214275.2	99.93	0.66	muddy water	Bacteria	Pseudomonadota	Gammaproteobacteria	Methylococcales	Methylococcaceae	Methylomicrobium	Methylomicrobium album
Methylomonas methanica MC09	GCF_000214665.1	99.93	1.39	soil	Bacteria	Pseudomonadota	Gammaproteobacteria	Methylococcales	Methylococcaceae	Methylomonas	Methylomonas methanica
Methylocystis parvus OBBP	GCF_000283235.1	99.68	0.95	not provided	Bacteria	Pseudomonadota	Alphaproteobacteria	Hyphomicrobiales	Methylocystaceae	Methylocystis	Methylocystis parvus
Methylacidiphilum fumariolicum SolV	GCF_000297415.1	99.32	0.34	not provided	Bacteria	Verrucomicrobiota	Methylacidiphilae	Methylacidiphilales	Methylacidiphilaceae	Methylacidiphilum (ex Ratnadevi et al. 2023)	Candidatus Methylacidiphilum fumarolicum
Methylococcus capsulatus str. Texas = ATCC 19069	GCF_000297615.1	99.89	0.69	not provided	Bacteria	Pseudomonadota	Gammaproteobacteria	Methylococcales	Methylococcaceae	Methylococcus	Methylococcus capsulatus
Methylocystis sp. SC2	GCF_000304315.1	99.37	0.32	not provided	Bacteria	Pseudomonadota	Alphaproteobacteria	Hyphomicrobiales	Methylocystaceae	Methylocystis	unclassified Methylocystis
Methylotuvimicrobium buryatense 5G	GCF_000341735.1	99.6	1.15	not provided; submitted under MIGS 2.1	Bacteria	Pseudomonadota	Gammaproteobacteria	Methylococcales	Methylococcaceae	Methylotuvimicrobium	Methylotuvimicrobium buryatense
Methylomonas sp. MK1	GCF_000365425.1	99.92	1.1	not provided	Bacteria	Pseudomonadota	Gammaproteobacteria	Methylococcales	Methylococcaceae	Methylomonas	unclassified Methylomonas
Methylocystis rosea SV97	GCF_000372845.1	100	0.63	not provided; submitted under MIGS 2.1	Bacteria	Pseudomonadota	Alphaproteobacteria	Hyphomicrobiales	Methylocystaceae	Methylocystis	Methylocystis rosea
Methylosarcina fibrata AML-C10	GCF_000372865.1	99.54	0.29	upper soil layer of a landfill; Athens; GA	Bacteria	Pseudomonadota	Gammaproteobacteria	Methylococcales	Methylococcaceae	Methylosarcina	Methylosarcina fibrata
Methylosinus sp. LW4	GCF_000379125.1	99.69	0	Lake Washington	Bacteria	Pseudomonadota	Alphaproteobacteria	Hyphomicrobiales	Methylocystaceae	Methylosinus	unclassified Methylosinus
Methylobacter marinus A45	GCF_000383855.1	98.75	0.47	not provided; submitted under MIGS 2.1	Bacteria	Pseudomonadota	Gammaproteobacteria	Methylococcales	Methylococcaceae	Methylobacter	Methylobacter marinus
Methylovulum miyakonense HT12	GCF_000384075.1	99.23	0.69	forest soil; Hyogo Prefecture; Japan	Bacteria	Pseudomonadota	Gammaproteobacteria	Methylococcales	Methylococcaceae	Methylovulum	Methylovulum miyakonense
Methyloferula stellata AR4	GCF_000385335.1	99.48	0	Lake Washington	Bacteria	Pseudomonadota	Alphaproteobacteria	Hyphomicrobiales	Beijerinckiaceae	Methyloferula	Methyloferula stellata
Methylohalobius crimeensis 10Ki	GCF_000421465.1	95.82	2.24	not provided	Bacteria	Pseudomonadota	Gammaproteobacteria	Methylococcales	Methylothermaceae	Methylohalobius	Methylohalobius crimeensis
Methylococcus capsulatus str. Texas = ATCC 19069	GCF_000424685.1	99.89	0.35	not provided	Bacteria	Pseudomonadota	Gammaproteobacteria	Methylococcales	Methylococcaceae	Methylococcus	Methylococcus capsulatus
Methylocaldum szegediense O-12	GCF_000427385.1	99.05	3.55	not provided	Bacteria	Pseudomonadota	Gammaproteobacteria	Methylococcales	Methylococcaceae	Methylocaldum	Methylocaldum szegediense
Methylocapsa acidiphila B2	GCF_000427445.1	99.58	0.31	not provided	Bacteria	Pseudomonadota	Alphaproteobacteria	Hyphomicrobiales	Beijerinckiaceae	Methylocapsa	Methylocapsa acidiphila
Methylobacter luteus IMV-B-3098	GCF_000427625.1	99.61	0.63	not provided	Bacteria	Pseudomonadota	Gammaproteobacteria	Methylococcales	Methylococcaceae	Methylobacter	Methylobacter luteus
Methyloglobulus morosus KoM1	GCF_000496735.2	99.02	1.96	profundal sediment sludge from Lake Constance	Bacteria	Pseudomonadota	Gammaproteobacteria	Methylococcales	Methylococcaceae	Methyloglobulus	Methyloglobulus morosus
Methylocystis sp. SB2	GCF_000499825.2	100	3.32	spring bog	Bacteria	Pseudomonadota	Alphaproteobacteria	Hyphomicrobiales	Methylocystaceae	Methylocystis	unclassified Methylocystis
Methylomonas sp. 11b	GCF_000515215.1	99.93	0.42	not provided; submitted under MIGS 2.1	Bacteria	Pseudomonadota	Gammaproteobacteria	Methylococcales	Methylococcaceae	Methylomonas	unclassified Methylomonas
Methylomicrobium lacus LW14	GCF_000527095.1	99.59	0.95	not provided; submitted under MIGS 2.1	Bacteria	Pseudomonadota	Gammaproteobacteria	Methylococcales	Methylococcaceae	Methylomicrobium	Methylomicrobium lacus
Methylosinus sp. LW3	GCF_000527115.1	100	0.31	not provided; submitted under MIGS 2.1	Bacteria	Pseudomonadota	Alphaproteobacteria	Hyphomicrobiales	Methylocystaceae	Methylosinus	unclassified Methylosinus
Methylobacter tundripaludum 21/22	GCF_000685925.1	99.37	2.82	not provided	Bacteria	Pseudomonadota	Gammaproteobacteria	Methylococcales	Methylococcaceae	Methylobacter	Methylobacter tundripaludum
Methylobacter tundripaludum 31/32	GCF_000733835.1	99.37	3.39	not provided	Bacteria	Pseudomonadota	Gammaproteobacteria	Methylococcales	Methylococcaceae	Methylobacter	Methylobacter tundripaludum
Methylomicrobium agile ATCC 35068	GCF_000733855.1	99.18	1.35	not provided	Bacteria	Pseudomonadota	Gammaproteobacteria	Methylococcales	Methylococcaceae	Methylomicrobium
Methylomarinum vadi IT-4	GCF_000733935.1	99.9	3.11	not provided	Bacteria	Pseudomonadota	Gammaproteobacteria	Methylococcales	Methylococcaceae	Methylomarinum
Methylosinus sp. PW2	GCF_000745215.1	100	0.3	not provided	Bacteria	Pseudomonadota	Alphaproteobacteria	Hyphomicrobiales	Methylocystaceae	Methylosinus	unclassified Methylosinus
Methylocapsa aurea KYG	GCF_000746085.1	99.37	0.57	not provided	Bacteria	Pseudomonadota	Alphaproteobacteria	Hyphomicrobiales	Beijerinckiaceae	Methylocapsa
Methylobacter sp. BBA5.1	GCF_000746145.1	99.29	1.89	not provided	Bacteria	Pseudomonadota	Gammaproteobacteria	Methylococcales	Methylococcaceae	Methylobacter	unclassified Methylobacter
Methylomonas denitrificans FJG1	GCF_000785705.2	99.93	0	not provided	Bacteria	Pseudomonadota	Gammaproteobacteria	Methylococcales	Methylococcaceae	Methylomonas
Methylacidiphilum kamchatkense Kam1	GCF_000817245.1	98.42	1.01	acidic hot spring	Bacteria	Verrucomicrobiota	Methylacidiphilae	Methylacidiphilales	Methylacidiphilaceae	Methylacidiphilum (ex Ratnadevi et al. 2023)	Methylacidiphilum kamchatkense
Methyloterricola oryzae 73a	GCF_000934725.1	99.25	1.58	not provided	Bacteria	Pseudomonadota	Gammaproteobacteria	Methylococcales	Methylococcaceae	Methyloterricola
Methylocucumis oryzae Sn10-6	GCF_000963695.1	95.12	2.12	rice field	Bacteria	Pseudomonadota	Gammaproteobacteria	Methylococcales	Methylococcaceae	Methylocucumis
Methylotuvimicrobium alcaliphilum 20Z	GCF_000968535.2	99.6	1.03	not provided	Bacteria	Pseudomonadota	Gammaproteobacteria	Methylococcales	Methylococcaceae	Methylotuvimicrobium	Methylotuvimicrobium alcaliphilum
Methylogaea oryzae JCM 16910	GCF_001312345.1	84.24	2.24	not provided	Bacteria	Pseudomonadota	Gammaproteobacteria	Methylococcales	Methylococcaceae	Methylogaea	Methylogaea oryzae
Methylomonas lenta R-45370	GCF_001644015.1	99.94	1.72	top layer of a denitrification tank of a waste water treatment plant	Bacteria	Pseudomonadota	Gammaproteobacteria	Methylococcales	Methylococcaceae	Methylomonas
Methylomonas koyamae R-45383	GCF_001644025.1	99.4	0.1	wetland	Bacteria	Pseudomonadota	Gammaproteobacteria	Methylococcales	Methylococcaceae	Methylomonas
Methylomonas methanica R-45363	GCF_001644035.1	99.93	1.25	top layer of a denitrification tank of a waste water treatment plant	Bacteria	Pseudomonadota	Gammaproteobacteria	Methylococcales	Methylococcaceae	Methylomonas
Methylomonas methanica NCIMB 11130	GCF_001644045.1	99.91	0	not provided	Bacteria	Pseudomonadota	Gammaproteobacteria	Methylococcales	Methylococcaceae	Methylomonas
Methylomonas koyamae R-49807	GCF_001644095.1	99.78	0.37	facultative waste stabilization pond	Bacteria	Pseudomonadota	Gammaproteobacteria	Methylococcales	Methylococcaceae	Methylomonas
Methylomonas methanica R-45371	GCF_001644115.1	99.59	1.6	top layer of a denitrification tank of a waste water treatment plant	Bacteria	Pseudomonadota	Gammaproteobacteria	Methylococcales	Methylococcaceae	Methylomonas
Methylosinus sp. R-45379	GCF_001644125.1	99.06	0.49	wetland	Bacteria	Pseudomonadota	Alphaproteobacteria	Hyphomicrobiales	Methylocystaceae	Methylosinus	unclassified Methylosinus
Methylomonas koyamae R-45378	GCF_001644135.1	99.79	0.37	wetland	Bacteria	Pseudomonadota	Gammaproteobacteria	Methylococcales	Methylococcaceae	Methylomonas
Methylomonas sp. DH-1	GCF_001644685.1	99.83	0.57	waste sludge of a brewery plant	Bacteria	Pseudomonadota	Gammaproteobacteria	Methylococcales	Methylococcaceae	Methylomonas	unclassified Methylomonas
Methylosinus sp. 3S-1	GCF_001675455.1	98.29	0	not provided	Bacteria	Pseudomonadota	Alphaproteobacteria	Hyphomicrobiales	Methylocystaceae	Methylosinus	unclassified Methylosinus
Methylomonas sp. LWB	GCF_001856095.1	99.92	0.43	not provided	Bacteria	Pseudomonadota	Gammaproteobacteria	Methylococcales	Methylococcaceae	Methylomonas	unclassified Methylomonas
Methylocaldum sp. 14B	GCF_002005105.1	99.57	3.48	not provided	Bacteria	Pseudomonadota	Gammaproteobacteria	Methylococcales	Methylococcaceae	Methylocaldum	unclassified Methylocaldum
Methyloprofundus sedimenti WF1	GCF_002072955.1	99.66	2.67	marine sediment	Bacteria	Pseudomonadota	Gammaproteobacteria	Methylococcales	Methylococcaceae	Methyloprofundus
Methylocystis bryophila S285	GCF_002117405.1	97.81	1.57	Soil	Bacteria	Pseudomonadota	Alphaproteobacteria	Hyphomicrobiales	Methylocystaceae	Methylocystis
Methylovulum psychrotolerans HV10_M2	GCF_002209385.1	99.59	0.47	soil	Bacteria	Pseudomonadota	Gammaproteobacteria	Methylococcales	Methylococcaceae	Methylovulum
Methylomonas koyamae LM6	GCF_002441955.1	99.8	0.37	muddy water	Bacteria	Pseudomonadota	Gammaproteobacteria	Methylococcales	Methylococcaceae	Methylomonas
Methylosinus trichosporium OB3b	GCF_002752655.1	100	0	soil	Bacteria	Pseudomonadota	Alphaproteobacteria	Hyphomicrobiales	Methylocystaceae	Methylosinus	Methylosinus trichosporium
Methylomonas sp. Kb3	GCF_002834115.1	99.85	0.48	rice rhizosphere	Bacteria	Pseudomonadota	Gammaproteobacteria	Methylococcales	Methylococcaceae	Methylomonas	unclassified Methylomonas
Methylocella silvestris TVC	GCF_002891535.1	99.06	0	permafrost sediment	Bacteria	Pseudomonadota	Alphaproteobacteria	Hyphomicrobiales	Beijerinckiaceae	Methylocella
Methylovulum psychrotolerans Sph1	GCF_002923755.1	99.6	0.58	cold methane seeps in a floodplain	Bacteria	Pseudomonadota	Gammaproteobacteria	Methylococcales	Methylococcaceae	Methylovulum
Methylobacter tundripaludum OWC-G53F	GCF_002934365.1	99.5	1.73	not provided	Bacteria	Pseudomonadota	Gammaproteobacteria	Methylococcales	Methylococcaceae	Methylobacter
Methylobacter tundripaludum OWC-DMM	GCF_002934385.1	99.71	1.21	not provided	Bacteria	Pseudomonadota	Gammaproteobacteria	Methylococcales	Methylococcaceae	Methylobacter
Methylosinus sporium DSM 17706	GCF_003113265.1	100	0.31	water	Bacteria	Pseudomonadota	Alphaproteobacteria	Hyphomicrobiales	Methylocystaceae	Methylosinus
Methylovirgula sp. 4M-Z18	GCF_003400305.1	98.75	0.94	forest soil	Bacteria	Pseudomonadota	Alphaproteobacteria	Hyphomicrobiales	Beijerinckiaceae	Methylovirgula	unclassified Methylovirgula
Methylocaldum marinum S8	GCF_003584645.1	99.83	4.93	sediment	Bacteria	Pseudomonadota	Gammaproteobacteria	Methylococcales	Methylococcaceae	Methylocaldum
Methylocystis hirsuta CSC1	GCF_003722355.1	99.37	1.21	uncontaminated groundwater aquifer	Bacteria	Pseudomonadota	Alphaproteobacteria	Hyphomicrobiales	Methylocystaceae	Methylocystis
Methylocystis rosea GW6	GCF_003855495.1	99.37	0.47	groundwater	Bacteria	Pseudomonadota	Alphaproteobacteria	Hyphomicrobiales	Methylocystaceae	Methylocystis
Candidatus Methylobacter oryzae KRF1	GCF_003994235.2	99.33	1.21	rice field soil	Bacteria	Pseudomonadota	Gammaproteobacteria	Methylococcales	Methylococcaceae	Methylobacter
Methylovirgula ligni BW863	GCF_004135935.1	98.43	0	acidic forest soil	Bacteria	Pseudomonadota	Alphaproteobacteria	Hyphomicrobiales	Beijerinckiaceae	Methylovirgula
Methylomonas methanica S-1	GCF_004343025.1	99.91	0	not provided	Bacteria	Pseudomonadota	Gammaproteobacteria	Methylococcales	Methylococcaceae	Methylomonas
Methylosinus sp. sav-2	GCF_004366495.1	100	0.31	not provided	Bacteria	Pseudomonadota	Alphaproteobacteria	Hyphomicrobiales	Methylocystaceae	Methylosinus	unclassified Methylosinus
Candidatus Methylacidiphilum fumarolicum Rib	GCF_004421155.1	99.32	0.34	hot spring	Bacteria	Verrucomicrobiota	Methylacidiphilae	Methylacidiphilales	Methylacidiphilaceae	Methylacidiphilum (ex Ratnadevi et al. 2023)
Candidatus Methylacidiphilum fumarolicum Ice	GCF_004421165.1	99.32	0.34	geothermal spring	Bacteria	Verrucomicrobiota	Methylacidiphilae	Methylacidiphilales	Methylacidiphilaceae	Methylacidiphilum (ex Ratnadevi et al. 2023)
Candidatus Methylacidiphilum fumarolicum Fdl	GCF_004421175.1	99.32	0.34	geothermal water	Bacteria	Verrucomicrobiota	Methylacidiphilae	Methylacidiphilales	Methylacidiphilaceae	Methylacidiphilum (ex Ratnadevi et al. 2023)
Methylacidiphilum sp. Yel	GCF_004421185.1	97.3	1.69	geothermal spring	Bacteria	Verrucomicrobiota	Methylacidiphilae	Methylacidiphilales	Methylacidiphilaceae	Methylacidiphilum (ex Ratnadevi et al. 2023)	unclassified Methylacidiphilum
Candidatus Methylacidiphilum fumarolicum Fur	GCF_004421195.1	99.32	0.34	hot spring	Bacteria	Verrucomicrobiota	Methylacidiphilae	Methylacidiphilales	Methylacidiphilaceae	Methylacidiphilum (ex Ratnadevi et al. 2023)
Methylacidiphilum caldifontis Phi	GCF_004421255.1	99.32	3.38	geothermal spring	Bacteria	Verrucomicrobiota	Methylacidiphilae	Methylacidiphilales	Methylacidiphilaceae	Methylacidiphilum (ex Ratnadevi et al. 2023)
Methylocystis heyeri H2	GCF_004802635.2	99.69	1.25	Sphagnum peat bog lake	Bacteria	Pseudomonadota	Alphaproteobacteria	Hyphomicrobiales	Methylocystaceae	Methylocystis
Methylocystis sp. B8	GCF_005771425.1	98.89	0.47	wetland	Bacteria	Pseudomonadota	Alphaproteobacteria	Hyphomicrobiales	Methylocystaceae	Methylocystis	unclassified Methylocystis
Methylotuvimicrobium buryatense 5GB1C	GCF_005931095.1	99.25	1.15	Soda lake sediment	Bacteria	Pseudomonadota	Gammaproteobacteria	Methylococcales	Methylococcaceae	Methylotuvimicrobium
Methylotetracoccus oryzae C50C1	GCF_006175985.1	99.08	3.27	Paddy field soil	Bacteria	Pseudomonadota	Gammaproteobacteria	Methylococcales	Methylococcaceae	Methylotetracoccus
Methylomonas koyamae SM2	GCF_006483455.1	99.79	0.78	root	Bacteria	Pseudomonadota	Gammaproteobacteria	Methylococcales	Methylococcaceae	Methylomonas
Methylosinus sporium SM89A	GCF_007004125.1	99.74	0.42	rhizosphere	Bacteria	Pseudomonadota	Alphaproteobacteria	Hyphomicrobiales	Methylocystaceae	Methylosinus
Methylomonas rhizoryzae GJ1	GCF_008632455.1	99.89	0.78	rice rhizosphere	Bacteria	Pseudomonadota	Gammaproteobacteria	Methylococcales	Methylococcaceae	Methylomonas
Candidatus Methylospira mobilis Shm1	GCF_009498235.1	97.46	3.32	Peat soil [ENVO:00005774]	Bacteria	Pseudomonadota	Gammaproteobacteria	Methylococcales	Methylococcaceae	Methylospira
Methylocystis rosea BRCS1	GCF_009685175.1	99.68	0.32	Lake sediment	Bacteria	Pseudomonadota	Alphaproteobacteria	Hyphomicrobiales	Methylocystaceae	Methylocystis
Methylocystis parvus BRCS2	GCF_009685195.1	100	0.95	Bog sediment	Bacteria	Pseudomonadota	Alphaproteobacteria	Hyphomicrobiales	Methylocystaceae	Methylocystis
Methylocapsa sp. S129	GCF_009765995.1	98.12	2.04	soil	Bacteria	Pseudomonadota	Alphaproteobacteria	Hyphomicrobiales	Beijerinckiaceae	Methylocapsa	unclassified Methylocapsa
Methylosinus sp. Ce-a6	GCF_009811655.1	99.84	0.1	not provided	Bacteria	Pseudomonadota	Alphaproteobacteria	Hyphomicrobiales	Methylocystaceae	Methylosinus	unclassified Methylosinus
Methylosinus sporium DSM 17706	GCF_009811675.1	100	0.31	not provided	Bacteria	Pseudomonadota	Alphaproteobacteria	Hyphomicrobiales	Methylocystaceae	Methylosinus
Methylicorpusculum oleiharenae XLMV4	GCF_009828925.2	99.94	3.58	oilsands tailings	Bacteria	Pseudomonadota	Gammaproteobacteria	Methylococcales	Methylococcaceae	Methylicorpusculum
Methylosinus sp. C49	GCF_009936375.1	100	0.34	soil	Bacteria	Pseudomonadota	Alphaproteobacteria	Hyphomicrobiales	Methylocystaceae	Methylosinus	unclassified Methylosinus
Methylocystis sp. MJC1	GCF_011058845.1	99.37	0.63	peat bog	Bacteria	Pseudomonadota	Alphaproteobacteria	Hyphomicrobiales	Methylocystaceae	Methylocystis	unclassified Methylocystis
Methylosinus sp. RM1	GCF_011378635.1	99.84	0.31	not provided	Bacteria	Pseudomonadota	Alphaproteobacteria	Hyphomicrobiales	Methylocystaceae	Methylosinus	unclassified Methylosinus
Methylococcus geothermalis IM1	GCF_012769535.1	99.33	1.11	Hot spring soil	Bacteria	Pseudomonadota	Gammaproteobacteria	Methylococcales	Methylococcaceae	Methylococcus
Methylomonas sp. ZR1	GCF_013141865.1	99.82	1.59	soil	Bacteria	Pseudomonadota	Gammaproteobacteria	Methylococcales	Methylococcaceae	Methylomonas	unclassified Methylomonas
Methylocystis silviterrae FS	GCF_013350005.1	99.37	0.63	forest soil	Bacteria	Pseudomonadota	Alphaproteobacteria	Hyphomicrobiales	Methylocystaceae	Methylocystis
Methylomonas albis EbA	GCF_014850955.1	99.77	0.52	water	Bacteria	Pseudomonadota	Gammaproteobacteria	Methylococcales	Methylococcaceae	Methylomonas
Methylomonas fluvii EbB	GCF_014850975.1	99.91	0.76	water	Bacteria	Pseudomonadota	Gammaproteobacteria	Methylococcales	Methylococcaceae	Methylomonas
Methylobacter sp. BlB1	GCF_015476545.1	99.73	1.72	Balck buck feces collected from a zoo	Bacteria	Pseudomonadota	Gammaproteobacteria	Methylococcales	Methylococcaceae	Methylobacter	unclassified Methylobacter
Methylosinus sp. H3A	GCF_015709455.1	99.84	0.31	riparian wetland soil	Bacteria	Pseudomonadota	Alphaproteobacteria	Hyphomicrobiales	Methylocystaceae	Methylosinus	unclassified Methylosinus
Methylocystis sp. H15	GCF_015709465.1	99.58	0.32	riparian wetland soil	Bacteria	Pseudomonadota	Alphaproteobacteria	Hyphomicrobiales	Methylocystaceae	Methylocystis	unclassified Methylocystis
Methylocystis sp. H62	GCF_015709515.1	99.68	0.32	riparian wetland soil	Bacteria	Pseudomonadota	Alphaproteobacteria	Hyphomicrobiales	Methylocystaceae	Methylocystis	unclassified Methylocystis
Methylocystis sp. L43	GCF_015709525.1	99.58	0.32	riparian wetland soil	Bacteria	Pseudomonadota	Alphaproteobacteria	Hyphomicrobiales	Methylocystaceae	Methylocystis	unclassified Methylocystis
Methylocystis sp. H4A	GCF_015709545.1	99.37	8.7	riparian wetland soil	Bacteria	Pseudomonadota	Alphaproteobacteria	Hyphomicrobiales	Methylocystaceae	Methylocystis	unclassified Methylocystis
Methylomonas sp. LL1	GCF_015711015.1	99.93	0.32	riparian wetland soil	Bacteria	Pseudomonadota	Gammaproteobacteria	Methylococcales	Methylococcaceae	Methylomonas	unclassified Methylomonas
Methylococcus sp. BF19-07	GCF_016106025.1	99.89	1.04	compost	Bacteria	Pseudomonadota	Gammaproteobacteria	Methylococcales	Methylococcaceae	Methylococcus	unclassified Methylococcus
Methylocystis sp. Sn-Cys	GCF_016745395.1	99.68	0.95	rice rhizosphere	Bacteria	Pseudomonadota	Alphaproteobacteria	Hyphomicrobiales	Methylocystaceae	Methylocystis	unclassified Methylocystis
Methylomicrobium sp. RS1	GCF_016745425.1	99.59	1.15	rice rhizosphere	Bacteria	Pseudomonadota	Gammaproteobacteria	Methylococcales	Methylococcaceae	Methylomicrobium	unclassified Methylomicrobium
Methylomonas sp. LW13	GCF_016865255.1	99.92	0.41	sediment	Bacteria	Pseudomonadota	Gammaproteobacteria	Methylococcales	Methylococcaceae	Methylomonas	unclassified Methylomonas
Methylococcus sp. EFPC2	GCF_016925495.1	99.57	1.69	stream biofilm	Bacteria	Pseudomonadota	Gammaproteobacteria	Methylococcales	Methylococcaceae	Methylococcus	unclassified Methylococcus
Methylomonas sp. EFPC1	GCF_016925515.1	99.9	0.43	stream biofilm	Bacteria	Pseudomonadota	Gammaproteobacteria	Methylococcales	Methylococcaceae	Methylomonas	unclassified Methylomonas
Methylacidiphilum caldifontis IT6	GCF_017310505.1	98.65	1.01	mud volcano	Bacteria	Verrucomicrobiota	Methylacidiphilae	Methylacidiphilales	Methylacidiphilaceae	Methylacidiphilum (ex Ratnadevi et al. 2023)
Candidatus Methylacidiphilum infernorum IT5	GCF_017310525.1	98.65	0.34	mud volcano	Bacteria	Verrucomicrobiota	Methylacidiphilae	Methylacidiphilales	Methylacidiphilaceae	Methylacidiphilum (ex Ratnadevi et al. 2023)
Methylacidimicrobium sp. B4	GCF_017310545.1	100	0	hot spring	Bacteria	Verrucomicrobiota	Verrucomicrobiota incertae sedis			Methylacidimicrobium	unclassified Methylacidimicrobium
Methylocaldum sp. RMAD-M	GCF_017832375.1	99.66	3.48	not provided	Bacteria	Pseudomonadota	Gammaproteobacteria	Methylococcales	Methylococcaceae	Methylocaldum	unclassified Methylocaldum
Methylovulum psychrotolerans S1L	GCF_018722605.1	99.6	0.44	lake water	Bacteria	Pseudomonadota	Gammaproteobacteria	Methylococcales	Methylococcaceae	Methylovulum
Methylomonas paludis S2AM	GCF_018734325.1	98.49	0.02	water	Bacteria	Pseudomonadota	Gammaproteobacteria	Methylococcales	Methylococcaceae	Methylomonas
Methylosinus sp. KRF6	GCF_018887255.1	100	0.78	rice rhizosphere	Bacteria	Pseudomonadota	Alphaproteobacteria	Hyphomicrobiales	Methylocystaceae	Methylosinus	unclassified Methylosinus
Methylocystis sp. MJC1	GCF_018982845.1	99.37	0.63	peat bog	Bacteria	Pseudomonadota	Alphaproteobacteria	Hyphomicrobiales	Methylocystaceae	Methylocystis	unclassified Methylocystis
Methylococcus sp. Mc7	GCF_019285515.1	99.63	2.08	freshwater sediment	Bacteria	Pseudomonadota	Gammaproteobacteria	Methylococcales	Methylococcaceae	Methylococcus	unclassified Methylococcus
Methylococcus capsulatus BH	GCF_019285535.1	99.56	0	landfill cover soil	Bacteria	Pseudomonadota	Gammaproteobacteria	Methylococcales	Methylococcaceae	Methylococcus
Methylococcus capsulatus KN2	GCF_019285555.1	99.56	0	activated sludge	Bacteria	Pseudomonadota	Gammaproteobacteria	Methylococcales	Methylococcaceae	Methylococcus
Methylococcus capsulatus IO1	GCF_019285575.1	99.56	0	activated sludge	Bacteria	Pseudomonadota	Gammaproteobacteria	Methylococcales	Methylococcaceae	Methylococcus
Methylovirgula sp. HY1	GCF_019343105.1	99.06	0.31	soil	Bacteria	Pseudomonadota	Alphaproteobacteria	Hyphomicrobiales	Beijerinckiaceae	Methylovirgula	unclassified Methylovirgula
Candidatus Methylacidiphilum fumarolicum Pic	GCF_019429645.1	99.32	0.34	Volcanic Lake	Bacteria	Verrucomicrobiota	Methylacidiphilae	Methylacidiphilales	Methylacidiphilaceae	Methylacidiphilum (ex Ratnadevi et al. 2023)
Methylomonas koyamae Fw12E-Y	GCF_019669905.1	99.82	0.39	flood water	Bacteria	Pseudomonadota	Gammaproteobacteria	Methylococcales	Methylococcaceae	Methylomonas
Methylogaea oryzae E10	GCF_019669985.1	99.4	1.81	soil-water interface of paddy field	Bacteria	Pseudomonadota	Gammaproteobacteria	Methylococcales	Methylococcaceae	Methylogaea
Methylomagnum ishizawai RS11D-Pr	GCF_019670005.1	98.87	2.23	rice rhizosphere	Bacteria	Pseudomonadota	Gammaproteobacteria	Methylococcales	Methylococcaceae	Methylomagnum
Methylosinus sp. Sm6	GCF_019802345.1	99.53	0.26	not provided	Bacteria	Pseudomonadota	Alphaproteobacteria	Hyphomicrobiales	Methylocystaceae	Methylosinus	unclassified Methylosinus
Methylocystis sp. WRRC1	GCF_020733155.1	99.68	0.5	mixed culture of methanotrophs with methane as carbon source	Bacteria	Pseudomonadota	Alphaproteobacteria	Hyphomicrobiales	Methylocystaceae	Methylocystis	unclassified Methylocystis
Methylocystis sp. SB2	GCF_022370455.1	98.47	0	spring bog	Bacteria	Pseudomonadota	Alphaproteobacteria	Hyphomicrobiales	Methylocystaceae	Methylocystis	unclassified Methylocystis
Methylobacter sp. S3L5C	GCF_022788635.1	99.6	2.83	hypoxic lake water	Bacteria	Pseudomonadota	Gammaproteobacteria	Methylococcales	Methylococcaceae	Methylobacter	unclassified Methylobacter
Methylococcus capsulatus MIR	GCF_023370095.1	99.56	0	activated sludge	Bacteria	Pseudomonadota	Gammaproteobacteria	Methylococcales	Methylococcaceae	Methylococcus
Candidatus Mycobacterium methanotrophicum Sulfur Cave	GCF_023515995.1	99.62	1.61	Cave biofilm	Bacteria	Actinobacteria	Actinomycetota	Actinomycetes	Mycobacteriales	Mycobacteriaceae	Mycobacterium
Methylomonas rapida MP1	GCF_024360925.2	99.6	0.7	lake sediments	Bacteria	Pseudomonadota	Gammaproteobacteria	Methylococcales	Methylococcaceae	Methylomonas
Methylocystis sp. NLS-7	GCF_024448135.1	99.68	0.32	landfill cover soil	Bacteria	Pseudomonadota	Alphaproteobacteria	Hyphomicrobiales	Methylocystaceae	Methylocystis	unclassified Methylocystis
Methylomonas sp. SURF-1	GCF_024505045.1	99.85	0.48	not provided	Bacteria	Pseudomonadota	Gammaproteobacteria	Methylococcales	Methylococcaceae	Methylomonas	unclassified Methylomonas
Methylomonas sp. WSC-7	GCF_024505055.1	99.92	0.1	not provided	Bacteria	Pseudomonadota	Gammaproteobacteria	Methylococcales	Methylococcaceae	Methylomonas	unclassified Methylomonas
Methylomonas sp. WSC-6	GCF_024505165.1	99.88	0.67	not provided	Bacteria	Pseudomonadota	Gammaproteobacteria	Methylococcales	Methylococcaceae	Methylomonas	unclassified Methylomonas
Methylomonas sp. SURF-2	GCF_024505185.1	99.89	0.36	not provided	Bacteria	Pseudomonadota	Gammaproteobacteria	Methylococcales	Methylococcaceae	Methylomonas	unclassified Methylomonas
Methylobacter psychrophilus Z-0021	GCF_025583945.1	99.6	1.89	tundra soil	Bacteria	Pseudomonadota	Gammaproteobacteria	Methylococcales	Methylococcaceae	Methylobacter
Methylococcus mesophilus 16-5	GCF_026247885.1	99.5	1.56	Rice field soil	Bacteria	Pseudomonadota	Gammaproteobacteria	Methylococcales	Methylococcaceae	Methylococcus
Methylocystis sp. MJC1	GCF_026427715.1	99.37	0.63	Alpine Peat Bogs	Bacteria	Pseudomonadota	Alphaproteobacteria	Hyphomicrobiales	Methylocystaceae	Methylocystis	unclassified Methylocystis
Methylobacter sp. YRD-M1	GCF_026727675.1	99.74	2.83	wetland soil	Bacteria	Pseudomonadota	Gammaproteobacteria	Methylococcales	Methylococcaceae	Methylobacter	unclassified Methylobacter
Methylocystis echinoides LMG27198	GCF_027923385.1	100	0.95	sludge	Bacteria	Pseudomonadota	Alphaproteobacteria	Hyphomicrobiales	Methylocystaceae	Methylocystis
Methylocystis iwaonis SS37A-Re	GCF_027925385.1	99.68	0.63	surface soil in rice paddy field	Bacteria	Pseudomonadota	Alphaproteobacteria	Hyphomicrobiales	Methylocystaceae	Methylocystis
Methylocystis bryophila DSM 21852	GCF_027925445.1	97.81	1.57	surface of Sphagnum peat on bank of bog lake	Bacteria	Pseudomonadota	Alphaproteobacteria	Hyphomicrobiales	Methylocystaceae	Methylocystis
Methylococcus capsulatus VKPM-B-12549	GCF_029478315.1	99.89	1.04	not provided	Bacteria	Pseudomonadota	Gammaproteobacteria	Methylococcales	Methylococcaceae	Methylococcus
Methylomonas sp. EFPC3	GCF_029643245.1	99.79	0.37	stream biofilm	Bacteria	Pseudomonadota	Gammaproteobacteria	Methylococcales	Methylococcaceae	Methylomonas	unclassified Methylomonas
Methylocapsa sp. D3K7	GCF_029855125.1	99.37	0.63	tundra soil	Bacteria	Pseudomonadota	Alphaproteobacteria	Hyphomicrobiales	Beijerinckiaceae	Methylocapsa	unclassified Methylocapsa
Methylomonas sp. UP202	GCF_029910655.1	99.85	0.38	canal sediment	Bacteria	Pseudomonadota	Gammaproteobacteria	Methylococcales	Methylococcaceae	Methylomonas	unclassified Methylomonas
Methylocystis sp. JR02	GCF_030063565.1	99.68	0.95	Paddy field	Bacteria	Pseudomonadota	Alphaproteobacteria	Hyphomicrobiales	Methylocystaceae	Methylocystis	unclassified Methylocystis
Methylomonas montana MW1	GCF_030490285.1	99.92	0.08	freshwater sediment	Bacteria	Pseudomonadota	Gammaproteobacteria	Methylococcales	Methylococcaceae	Methylomonas
Methylomarinum sp. Ch1-1	GCF_030717995.1	97.24	3.87	ENVO:01001036	Bacteria	Pseudomonadota	Gammaproteobacteria	Methylococcales	Methylococcaceae	Methylomarinum	unclassified Methylomarinum
Methylomonas koyamae MY1	GCF_031582845.1	95.03	4	freshwater pool	Bacteria	Pseudomonadota	Gammaproteobacteria	Methylococcales	Methylococcaceae	Methylomonas
Methylocella sp. CPCC 101449	GCF_031921685.1	90.96	12.8	cadmium contaminated soil	Bacteria	Pseudomonadota	Alphaproteobacteria	Hyphomicrobiales	Beijerinckiaceae	Methylocella	unclassified Methylocella
Methylomonas sp. MV1	GCF_032142695.1	94.56	3.96	freshwater pool	Bacteria	Pseudomonadota	Gammaproteobacteria	Methylococcales	Methylococcaceae	Methylomonas	unclassified Methylomonas
Methylomonas sp. MO1	GCF_032142715.1	98.91	1.34	freshwater pool	Bacteria	Pseudomonadota	Gammaproteobacteria	Methylococcales	Methylococcaceae	Methylomonas	unclassified Methylomonas
Candidatus Methylospira mobilis SPMX	GCF_032390415.1	96.93	2.36	peat bog	Bacteria	Pseudomonadota	Gammaproteobacteria	Methylococcales	Methylococcaceae	Methylospira
Methylocapsa palsarum NE2	GCF_900114285.1	99.16	1.88	not provided	Bacteria	Pseudomonadota	Alphaproteobacteria	Hyphomicrobiales	Beijerinckiaceae	Methylocapsa
Methylomagnum ishizawai 175	GCF_900155475.1	99.57	3.47	not provided	Bacteria	Pseudomonadota	Gammaproteobacteria	Methylococcales	Methylococcaceae	Methylomagnum
Crenothrix polyspora RSM_CP2	GCF_900163745.1	92.1	3.6	not provided	Bacteria	Pseudomonadota	Gammaproteobacteria	Methylococcales	Crenotrichaceae	Crenothrix
Crenothrix polyspora RSM_CP1	GCF_900163755.1	98.26	1.4	not provided	Bacteria	Pseudomonadota	Gammaproteobacteria	Methylococcales	Crenotrichaceae	Crenothrix
Methylocella tundrae MTUNDRAET4 annotated genome	GCF_900749825.1	98.35	0.73	not provided	Bacteria	Pseudomonadota	Alphaproteobacteria	Hyphomicrobiales	Beijerinckiaceae	Methylocella
Methylocella tundrae 2	GCF_901905185.1	99.69	0.94	water and sediments	Bacteria	Pseudomonadota	Alphaproteobacteria	Hyphomicrobiales	Beijerinckiaceae	Methylocella
Methylacidimicrobium tartarophylax 4A	GCF_902143375.2	97.97	1.35	not provided	Bacteria	Verrucomicrobiota	Verrucomicrobiota incertae sedis			Methylacidimicrobium
Methylacidimicrobium cyclopophantes 3B	GCF_902143385.2	98.65	0.68	not provided	Bacteria	Verrucomicrobiota	Verrucomicrobiota incertae sedis			Methylacidimicrobium
Candidatus Methylobacter favarea METHB21	GCF_902806695.1	99.13	0.4	not provided	Bacteria	Pseudomonadota	Gammaproteobacteria	Methylococcales	Methylococcaceae	Methylobacter
Methylacidimicrobium sp. AP8	GCF_903064525.1	100	0.68	not provided	Bacteria	Verrucomicrobiota	Verrucomicrobiota incertae sedis			Methylacidimicrobium	unclassified Methylacidimicrobium
Methylomonas fluvii ElbeB	GCF_903064685.1	99.91	0.76	water	Bacteria	Pseudomonadota	Gammaproteobacteria	Methylococcales	Methylococcaceae	Methylomonas
Methylomonas albis ElbeA	GCF_903064715.1	99.77	0.52	water	Bacteria	Pseudomonadota	Gammaproteobacteria	Methylococcales	Methylococcaceae	Methylomonas
Methylococcus capsulatus Mc(Nor)	GCF_949769275.1	99.9	0	not provided	Bacteria	Pseudomonadota	Gammaproteobacteria	Methylococcales	Methylococcaceae	Methylococcus
Candidatus Methylacidiphilum fumarolicum	GCF_949774925.1	99.32	1.01	not provided	Bacteria	Verrucomicrobiota	Methylacidiphilae	Methylacidiphilales	Methylacidiphilaceae	Methylacidiphilum (ex Ratnadevi et al. 2023)
