# Supplementary material for: Diversity and distribution of the lanthanome in aerobic methane-oxidising bacteria
Source: Research Square preprint supplement (doi:10.21203/rs.3.rs-6350491/v1), 2025-05-22
Supplement: Supplementary file 2 [file 4b382f225447c969d4b065c1.xlsx]

## Sheet: Lanthanome_counts
Genome Accession	Complete name with strain	mxaF	xoxF1	xoxF2	xoxF3	xoxF5	lanM	lanP	lanA	lutH
GCA_002007425.1	Chromatiales bacterium USCg_Taylor	1	0	0	0	1	0	0	0	1
GCA_002890675.1	Beijerinckiaceae bacterium USCa_MF	0	0	0	0	1	0	0	0	1
GCA_004564215.1	Beijerinckiaceae bacterium MG08	1	0	0	0	1	1	0	0	1
GCF_000008325.1	Methylococcus capsulatus str. Bath	1	0	0	0	1	0	0	0	1
GCF_000019665.1	Methylacidiphilum infernorum V4	0	0	1	0	0	0	0	0	1
GCF_000021745.1	Methylocella silvestris BL2	1	1	0	1	2	2	0	0	2
GCF_000188155.2	Methylocystis sp. ATCC 49242	1	0	0	1	2	1	0	0	1
GCF_000190755.2	Methylobacter tundripaludum SV96	1	0	0	0	1	0	0	0	1
GCF_000214275.2	Methylomicrobium album BG8	1	0	0	0	1	0	2	0	2
GCF_000214665.1	Methylomonas methanica MC09	1	0	0	0	1	0	0	1	1
GCF_000283235.1	Methylocystis parvus OBBP	1	0	0	0	2	1	0	0	1
GCF_000297415.1	Methylacidiphilum fumariolicum SolV	0	0	1	0	0	0	0	0	1
GCF_000297615.1	Methylococcus capsulatus str. Texas = ATCC 19069	1	0	0	0	1	0	0	0	1
GCF_000304315.1	Methylocystis sp. SC2	1	0	0	1	1	1	0	0	1
GCF_000341735.1	Methylotuvimicrobium buryatense 5G	1	0	0	0	1	0	2	2	0
GCF_000365425.1	Methylomonas sp. MK1	1	0	0	1	1	0	1	1	1
GCF_000372845.1	Methylocystis rosea SV97	1	0	0	1	1	1	0	0	1
GCF_000372865.1	Methylosarcina fibrata AML-C10	1	0	0	0	1	0	1	0	2
GCF_000379125.1	Methylosinus sp. LW4	1	0	0	0	2	1	0	0	2
GCF_000383855.1	Methylobacter marinus A45	1	0	0	1	1	0	2	2	1
GCF_000384075.1	Methylovulum miyakonense HT12	1	0	0	0	1	0	0	0	2
GCF_000385335.1	Methyloferula stellata AR4	1	1	0	1	3	1	0	0	2
GCF_000421465.1	Methylohalobius crimeensis 10Ki	1	0	0	0	1	0	1	1	1
GCF_000424685.1	Methylococcus capsulatus str. Texas = ATCC 19069	1	0	0	0	1	0	0	0	1
GCF_000427385.1	Methylocaldum szegediense O-12	1	0	0	1	1	0	1	0	2
GCF_000427445.1	Methylocapsa acidiphila B2	1	0	0	0	1	1	0	0	1
GCF_000427625.1	Methylobacter luteus IMV-B-3098	1	0	0	1	1	0	0	1	3
GCF_000496735.2	Methyloglobulus morosus KoM1	1	0	0	0	1	0	1	0	1
GCF_000499825.2	Methylocystis sp. SB2	1	0	0	0	1	1	0	0	1
GCF_000515215.1	Methylomonas sp. 11b	1	0	0	0	1	0	1	0	1
GCF_000527095.1	Methylomicrobium lacus LW14	1	0	0	0	1	0	0	0	1
GCF_000527115.1	Methylosinus sp. LW3	1	0	0	0	2	1	0	0	1
GCF_000685925.1	Methylobacter tundripaludum 21/22	1	0	0	0	1	0	1	0	1
GCF_000733835.1	Methylobacter tundripaludum 31/32	1	0	0	0	1	0	0	0	1
GCF_000733855.1	Methylomicrobium agile ATCC 35068	1	0	0	0	1	0	2	0	3
GCF_000733935.1	Methylomarinum vadi IT-4	1	0	0	0	1	0	1	0	1
GCF_000745215.1	Methylosinus sp. PW2	1	0	0	0	3	1	0	0	1
GCF_000746085.1	Methylocapsa aurea KYG	1	0	0	0	1	1	0	0	1
GCF_000746145.1	Methylobacter sp. BBA5.1	1	0	0	1	1	0	1	1	1
GCF_000785705.2	Methylomonas denitrificans FJG1	1	0	0	0	1	0	0	1	1
GCF_000817245.1	Methylacidiphilum kamchatkense Kam1	0	0	1	0	0	0	0	0	1
GCF_000934725.1	Methyloterricola oryzae 73a	1	0	0	0	1	0	1	0	1
GCF_000963695.1	Methylocucumis oryzae Sn10-6	1	0	0	0	1	0	1	5	2
GCF_000968535.2	Methylotuvimicrobium alcaliphilum 20Z	1	0	0	0	1	0	2	2	0
GCF_001312345.1	Methylogaea oryzae JCM 16910	2	0	0	0	0	0	0	0	2
GCF_001644015.1	Methylomonas lenta R-45370	1	0	0	0	1	0	1	0	1
GCF_001644025.1	Methylomonas koyamae R-45383	1	0	0	1	1	0	1	1	2
GCF_001644035.1	Methylomonas methanica R-45363	1	0	0	0	1	0	2	2	1
GCF_001644045.1	Methylomonas methanica NCIMB 11130	1	0	0	0	1	0	0	1	1
GCF_001644095.1	Methylomonas koyamae R-49807	1	0	0	0	1	0	1	2	1
GCF_001644115.1	Methylomonas methanica R-45371	1	0	0	0	1	0	1	0	1
GCF_001644125.1	Methylosinus sp. R-45379	1	0	0	0	2	1	0	0	1
GCF_001644135.1	Methylomonas koyamae R-45378	1	0	0	0	1	0	1	2	1
GCF_001644685.1	Methylomonas sp. DH-1	1	0	0	0	1	0	1	2	2
GCF_001675455.1	Methylosinus sp. 3S-1	1	0	0	1	1	1	0	0	1
GCF_001856095.1	Methylomonas sp. LWB	1	0	0	1	1	0	1	1	2
GCF_002005105.1	Methylocaldum sp. 14B	1	0	0	3	1	0	1	2	2
GCF_002072955.1	Methyloprofundus sedimenti WF1	1	0	0	0	1	0	1	0	2
GCF_002117405.1	Methylocystis bryophila S285	1	0	0	0	2	2	0	0	1
GCF_002209385.1	Methylovulum psychrotolerans HV10_M2	1	0	0	1	1	0	0	0	1
GCF_002441955.1	Methylomonas koyamae LM6	1	0	0	0	1	0	1	2	1
GCF_002752655.1	Methylosinus trichosporium OB3b	1	0	0	1	1	1	0	0	1
GCF_002834115.1	Methylomonas sp. Kb3	1	0	0	0	1	0	1	1	1
GCF_002891535.1	Methylocella silvestris TVC	1	1	0	0	2	2	0	0	3
GCF_002923755.1	Methylovulum psychrotolerans Sph1	1	0	0	1	1	0	0	0	1
GCF_002934365.1	Methylobacter tundripaludum OWC-G53F	1	0	0	0	1	0	1	1	1
GCF_002934385.1	Methylobacter tundripaludum OWC-DMM	1	0	0	0	1	0	0	1	1
GCF_003113265.1	Methylosinus sporium DSM 17706	1	0	0	0	2	1	0	0	1
GCF_003400305.1	Methylovirgula sp. 4M-Z18	0	0	0	0	0	0	0	0	0
GCF_003584645.1	Methylocaldum marinum S8	1	0	0	2	1	0	1	2	2
GCF_003722355.1	Methylocystis hirsuta CSC1	1	0	0	0	1	1	0	0	1
GCF_003855495.1	Methylocystis rosea GW6	1	0	0	0	1	1	0	0	1
GCF_003994235.2	Candidatus Methylobacter oryzae KRF1	1	0	0	0	1	0	0	2	1
GCF_004135935.1	Methylovirgula ligni BW863	1	3	0	1	0	2	0	0	1
GCF_004343025.1	Methylomonas methanica S-1	1	0	0	0	1	0	0	1	1
GCF_004366495.1	Methylosinus sp. sav-2	1	0	0	0	2	1	0	0	1
GCF_004421155.1	Candidatus Methylacidiphilum fumarolicum Rib	0	0	1	0	0	0	0	0	1
GCF_004421165.1	Candidatus Methylacidiphilum fumarolicum Ice	0	0	1	0	0	0	0	0	1
GCF_004421175.1	Candidatus Methylacidiphilum fumarolicum Fdl	0	0	1	0	0	0	0	0	1
GCF_004421185.1	Methylacidiphilum sp. Yel	0	0	1	0	0	0	0	0	1
GCF_004421195.1	Candidatus Methylacidiphilum fumarolicum Fur	0	0	1	0	0	0	0	0	1
GCF_004421255.1	Methylacidiphilum caldifontis Phi	0	0	1	0	0	0	0	0	1
GCF_004802635.2	Methylocystis heyeri H2	1	0	0	1	2	1	0	0	1
GCF_005771425.1	Methylocystis sp. B8	1	0	0	0	1	1	0	0	1
GCF_005931095.1	Methylotuvimicrobium buryatense 5GB1C	1	0	0	0	1	0	2	2	0
GCF_006175985.1	Methylotetracoccus oryzae C50C1	1	0	0	0	1	0	2	0	1
GCF_006483455.1	Methylomonas koyamae SM2	1	0	0	0	1	0	1	1	2
GCF_007004125.1	Methylosinus sporium SM89A	1	0	0	0	2	1	0	0	1
GCF_008632455.1	Methylomonas rhizoryzae GJ1	1	0	0	0	1	0	1	2	2
GCF_009498235.1	Candidatus Methylospira mobilis Shm1	1	0	0	0	2	0	0	0	1
GCF_009685175.1	Methylocystis rosea BRCS1	1	0	0	0	1	1	0	0	1
GCF_009685195.1	Methylocystis parvus BRCS2	1	0	0	0	3	1	0	0	1
GCF_009765995.1	Methylocapsa sp. S129	0	0	0	0	0	0	0	0	0
GCF_009811655.1	Methylosinus sp. Ce-a6	1	0	0	0	4	1	0	1	1
GCF_009811675.1	Methylosinus sporium DSM 17706	1	0	0	0	2	1	0	0	1
GCF_009828925.2	Methylicorpusculum oleiharenae XLMV4	1	0	0	0	1	0	3	2	1
GCF_009936375.1	Methylosinus sp. C49	1	0	0	0	3	1	0	0	1
GCF_011058845.1	Methylocystis sp. MJC1	1	0	0	1	2	1	0	0	1
GCF_011378635.1	Methylosinus sp. RM1	1	0	0	0	3	1	0	0	1
GCF_012769535.1	Methylococcus geothermalis IM1	1	0	0	0	1	0	0	0	1
GCF_013141865.1	Methylomonas sp. ZR1	1	0	0	0	1	0	1	2	1
GCF_013350005.1	Methylocystis silviterrae FS	1	0	0	0	1	1	0	0	1
GCF_014850955.1	Methylomonas albis EbA	1	0	0	2	1	0	1	1	1
GCF_014850975.1	Methylomonas fluvii EbB	1	0	0	0	1	0	1	2	1
GCF_015476545.1	Methylobacter sp. BlB1	1	0	0	0	1	0	2	1	2
GCF_015709455.1	Methylosinus sp. H3A	1	0	0	0	2	1	0	0	1
GCF_015709465.1	Methylocystis sp. H15	1	0	0	1	1	1	0	0	1
GCF_015709515.1	Methylocystis sp. H62	1	0	0	0	1	1	0	0	1
GCF_015709525.1	Methylocystis sp. L43	1	0	0	1	1	1	0	0	1
GCF_015709545.1	Methylocystis sp. H4A	1	0	0	0	1	1	0	0	1
GCF_015711015.1	Methylomonas sp. LL1	1	0	0	1	1	0	1	2	1
GCF_016106025.1	Methylococcus sp. BF19-07	1	0	0	0	1	0	1	0	1
GCF_016745395.1	Methylocystis sp. Sn-Cys	1	0	0	1	3	1	0	0	1
GCF_016745425.1	Methylomicrobium sp. RS1	1	0	0	1	1	0	1	0	2
GCF_016865255.1	Methylomonas sp. LW13	1	0	0	0	1	0	1	1	1
GCF_016925495.1	Methylococcus sp. EFPC2	1	0	0	1	2	0	0	0	1
GCF_016925515.1	Methylomonas sp. EFPC1	1	0	0	0	1	0	1	1	1
GCF_017310505.1	Methylacidiphilum caldifontis IT6	0	0	1	0	0	0	0	0	1
GCF_017310525.1	Candidatus Methylacidiphilum infernorum IT5	0	0	1	0	0	0	0	0	1
GCF_017310545.1	Methylacidimicrobium sp. B4	0	1	1	0	0	0	1	0	1
GCF_017832375.1	Methylocaldum sp. RMAD-M	1	0	0	3	1	0	1	3	2
GCF_018722605.1	Methylovulum psychrotolerans S1L	1	0	0	0	1	0	0	0	1
GCF_018734325.1	Methylomonas paludis S2AM	1	0	0	1	1	0	0	0	1
GCF_018887255.1	Methylosinus sp. KRF6	1	0	0	0	3	1	0	0	1
GCF_018982845.1	Methylocystis sp. MJC1	1	0	0	1	3	1	0	0	1
GCF_019285515.1	Methylococcus sp. Mc7	1	0	0	0	1	0	1	0	1
GCF_019285535.1	Methylococcus capsulatus BH	1	0	0	0	1	0	0	0	1
GCF_019285555.1	Methylococcus capsulatus KN2	1	0	0	0	1	0	0	0	1
GCF_019285575.1	Methylococcus capsulatus IO1	1	0	0	0	1	0	0	0	1
GCF_019343105.1	Methylovirgula sp. HY1	0	0	0	1	3	1	0	0	1
GCF_019429645.1	Candidatus Methylacidiphilum fumarolicum Pic	0	0	1	0	0	0	0	0	1
GCF_019669905.1	Methylomonas koyamae Fw12E-Y	1	0	0	0	1	0	1	2	1
GCF_019669985.1	Methylogaea oryzae E10	1	0	0	0	1	0	0	0	1
GCF_019670005.1	Methylomagnum ishizawai RS11D-Pr	1	0	0	1	1	0	1	0	2
GCF_019802345.1	Methylosinus sp. Sm6	1	0	0	1	1	1	0	0	1
GCF_020733155.1	Methylocystis sp. WRRC1	1	0	0	1	2	1	0	0	1
GCF_022370455.1	Methylocystis sp. SB2	1	0	0	0	1	1	0	0	1
GCF_022788635.1	Methylobacter sp. S3L5C	1	0	0	0	1	0	1	1	2
GCF_023370095.1	Methylococcus capsulatus MIR	1	0	0	0	1	0	0	0	1
GCF_023515995.1	Candidatus Mycobacterium methanotrophicum Sulfur Cave	0	0	0	0	0	0	0	0	0
GCF_024360925.2	Methylomonas rapida MP1	1	0	0	0	1	0	1	1	1
GCF_024448135.1	Methylocystis sp. NLS-7	1	0	0	1	1	1	0	0	1
GCF_024505045.1	Methylomonas sp. SURF-1	1	0	0	0	1	0	1	2	1
GCF_024505055.1	Methylomonas sp. WSC-7	1	0	0	0	1	0	1	0	1
GCF_024505165.1	Methylomonas sp. WSC-6	1	0	0	0	1	0	1	2	1
GCF_024505185.1	Methylomonas sp. SURF-2	1	0	0	0	1	0	1	2	1
GCF_025583945.1	Methylobacter psychrophilus Z-0021	1	0	0	0	1	0	1	1	1
GCF_026247885.1	Methylococcus mesophilus 16-5	1	0	0	0	1	0	1	0	1
GCF_026427715.1	Methylocystis sp. MJC1	1	0	0	1	3	1	0	0	1
GCF_026727675.1	Methylobacter sp. YRD-M1	1	0	0	1	1	0	2	1	2
GCF_027923385.1	Methylocystis echinoides LMG27198	1	0	0	2	3	1	0	0	2
GCF_027925385.1	Methylocystis iwaonis SS37A-Re	1	0	0	0	3	1	0	0	1
GCF_027925445.1	Methylocystis bryophila DSM 21852	1	0	0	0	2	2	0	0	1
GCF_029478315.1	Methylococcus capsulatus VKPM-B-12549	1	0	0	0	1	0	1	0	2
GCF_029643245.1	Methylomonas sp. EFPC3	1	0	0	0	1	0	1	2	3
GCF_029855125.1	Methylocapsa sp. D3K7	1	0	0	0	1	1	0	0	1
GCF_029910655.1	Methylomonas sp. UP202	1	0	0	1	1	0	1	1	2
GCF_030063565.1	Methylocystis sp. JR02	1	0	0	1	3	1	0	0	1
GCF_030490285.1	Methylomonas montana MW1	1	0	0	0	1	0	0	0	1
GCF_030717995.1	Methylomarinum sp. Ch1-1	1	0	0	0	1	0	1	0	1
GCF_031582845.1	Methylomonas koyamae MY1	1	0	0	0	1	0	1	2	1
GCF_031921685.1	Methylocella sp. CPCC 101449	0	0	0	0	0	0	0	1	1
GCF_032142695.1	Methylomonas sp. MV1	1	0	0	1	1	0	1	1	2
GCF_032142715.1	Methylomonas sp. MO1	1	0	0	0	1	0	1	0	1
GCF_032390415.1	Candidatus Methylospira mobilis SPMX	1	0	0	0	2	0	0	0	1
GCF_900114285.1	Methylocapsa palsarum NE2	1	0	0	0	1	1	0	0	1
GCF_900155475.1	Methylomagnum ishizawai 175	1	0	0	0	1	0	1	0	1
GCF_900163745.1	Crenothrix polyspora RSM_CP2	0	0	0	0	1	0	0	1	0
GCF_900163755.1	Crenothrix polyspora RSM_CP1	1	0	0	0	1	0	0	1	1
GCF_900749825.1	Methylocella tundrae MTUNDRAET4 annotated genome	1	1	0	1	2	2	0	0	2
GCF_901905185.1	Methylocella tundrae 2	0	0	0	1	2	1	0	0	1
GCF_902143375.2	Methylacidimicrobium tartarophylax 4A	0	1	1	0	0	0	1	0	1
GCF_902143385.2	Methylacidimicrobium cyclopophantes 3B	0	1	1	0	0	0	1	0	2
GCF_902806695.1	Candidatus Methylobacter favarea METHB21	0	0	0	0	1	0	0	0	1
GCF_903064525.1	Methylacidimicrobium sp. AP8	0	1	1	0	0	0	0	0	1
GCF_903064685.1	Methylomonas fluvii ElbeB	1	0	0	0	1	0	1	2	1
GCF_903064715.1	Methylomonas albis ElbeA	1	0	0	2	1	0	1	1	1
GCF_949769275.1	Methylococcus capsulatus Mc(Nor)	1	0	0	0	1	0	0	0	1
GCF_949774925.1	Candidatus Methylacidiphilum fumarolicum	0	0	1	0	0	0	0	0	1

## Sheet: Actino
Genome Accession	Complete name with strain	mxaF	xoxF1	xoxF2	xoxF3	xoxF5
GCF_023515995.1	Candidatus Mycobacterium methanotrophicum Sulfur Cave	0	0	0	0	0

## Sheet: Alpha
Genome Accession	Complete name with strain	mxaF	xoxF1	xoxF2	xoxF3	xoxF5
GCA_002890675.1	Beijerinckiaceae bacterium USCa_MF	0	0	0	0	1
GCA_004564215.1	Beijerinckiaceae bacterium MG08	1	0	0	0	1
GCF_000021745.1	Methylocella silvestris BL2	1	1	0	1	2
GCF_000188155.2	Methylocystis sp. ATCC 49242	1	0	0	1	2
GCF_000283235.1	Methylocystis parvus OBBP	1	0	0	0	2
GCF_000304315.1	Methylocystis sp. SC2	1	0	0	1	1
GCF_000372845.1	Methylocystis rosea SV97	1	0	0	1	1
GCF_000379125.1	Methylosinus sp. LW4	1	0	0	0	2
GCF_000385335.1	Methyloferula stellata AR4	1	1	0	1	3
GCF_000427445.1	Methylocapsa acidiphila B2	1	0	0	0	1
GCF_000499825.2	Methylocystis sp. SB2	1	0	0	0	1
GCF_000527115.1	Methylosinus sp. LW3	1	0	0	0	2
GCF_000745215.1	Methylosinus sp. PW2	1	0	0	0	3
GCF_000746085.1	Methylocapsa aurea KYG	1	0	0	0	1
GCF_001644125.1	Methylosinus sp. R-45379	1	0	0	0	2
GCF_001675455.1	Methylosinus sp. 3S-1	1	0	0	1	1
GCF_002117405.1	Methylocystis bryophila S285	1	0	0	0	2
GCF_002752655.1	Methylosinus trichosporium OB3b	1	0	0	1	1
GCF_002891535.1	Methylocella silvestris TVC	1	1	0	0	2
GCF_003113265.1	Methylosinus sporium DSM 17706	1	0	0	0	2
GCF_003400305.1	Methylovirgula sp. 4M-Z18	0	0	0	0	0
GCF_003722355.1	Methylocystis hirsuta CSC1	1	0	0	0	1
GCF_003855495.1	Methylocystis rosea GW6	1	0	0	0	1
GCF_004135935.1	Methylovirgula ligni BW863	1	3	0	1	0
GCF_004366495.1	Methylosinus sp. sav-2	1	0	0	0	2
GCF_004802635.2	Methylocystis heyeri H2	1	0	0	1	2
GCF_005771425.1	Methylocystis sp. B8	1	0	0	0	1
GCF_007004125.1	Methylosinus sporium SM89A	1	0	0	0	2
GCF_009685175.1	Methylocystis rosea BRCS1	1	0	0	0	1
GCF_009685195.1	Methylocystis parvus BRCS2	1	0	0	0	3
GCF_009765995.1	Methylocapsa sp. S129	0	0	0	0	0
GCF_009811655.1	Methylosinus sp. Ce-a6	1	0	0	0	4
GCF_009811675.1	Methylosinus sporium DSM 17706	1	0	0	0	2
GCF_009936375.1	Methylosinus sp. C49	1	0	0	0	3
GCF_011058845.1	Methylocystis sp. MJC1	1	0	0	1	2
GCF_011378635.1	Methylosinus sp. RM1	1	0	0	0	3
GCF_013350005.1	Methylocystis silviterrae FS	1	0	0	0	1
GCF_015709455.1	Methylosinus sp. H3A	1	0	0	0	2
GCF_015709465.1	Methylocystis sp. H15	1	0	0	1	1
GCF_015709515.1	Methylocystis sp. H62	1	0	0	0	1
GCF_015709525.1	Methylocystis sp. L43	1	0	0	1	1
GCF_015709545.1	Methylocystis sp. H4A	1	0	0	0	1
GCF_016745395.1	Methylocystis sp. Sn-Cys	1	0	0	1	3
GCF_018887255.1	Methylosinus sp. KRF6	1	0	0	0	3
GCF_018982845.1	Methylocystis sp. MJC1	1	0	0	1	3
GCF_019343105.1	Methylovirgula sp. HY1	0	0	0	1	3
GCF_019802345.1	Methylosinus sp. Sm6	1	0	0	1	1
GCF_020733155.1	Methylocystis sp. WRRC1	1	0	0	1	2
GCF_022370455.1	Methylocystis sp. SB2	1	0	0	0	1
GCF_024448135.1	Methylocystis sp. NLS-7	1	0	0	1	1
GCF_026427715.1	Methylocystis sp. MJC1	1	0	0	1	3
GCF_027923385.1	Methylocystis echinoides LMG27198	1	0	0	2	3
GCF_027925385.1	Methylocystis iwaonis SS37A-Re	1	0	0	0	3
GCF_027925445.1	Methylocystis bryophila DSM 21852	1	0	0	0	2
GCF_029855125.1	Methylocapsa sp. D3K7	1	0	0	0	1
GCF_030063565.1	Methylocystis sp. JR02	1	0	0	1	3
GCF_031921685.1	Methylocella sp. CPCC 101449	0	0	0	0	0
GCF_900114285.1	Methylocapsa palsarum NE2	1	0	0	0	1
GCF_900749825.1	Methylocella tundrae MTUNDRAET4 annotated genome	1	1	0	1	2
GCF_901905185.1	Methylocella tundrae 2	0	0	0	1	2

## Sheet: Gamma
Genome Accession	Complete name with strain	mxaF	xoxF1	xoxF2	xoxF3	xoxF5
GCA_002007425.1	Chromatiales bacterium USCg_Taylor	1	0	0	0	1
GCF_000008325.1	Methylococcus capsulatus str. Bath	1	0	0	0	1
GCF_000190755.2	Methylobacter tundripaludum SV96	1	0	0	0	1
GCF_000214275.2	Methylomicrobium album BG8	1	0	0	0	1
GCF_000214665.1	Methylomonas methanica MC09	1	0	0	0	1
GCF_000297615.1	Methylococcus capsulatus str. Texas = ATCC 19069	1	0	0	0	1
GCF_000341735.1	Methylotuvimicrobium buryatense 5G	1	0	0	0	1
GCF_000365425.1	Methylomonas sp. MK1	1	0	0	1	1
GCF_000372865.1	Methylosarcina fibrata AML-C10	1	0	0	0	1
GCF_000383855.1	Methylobacter marinus A45	1	0	0	1	1
GCF_000384075.1	Methylovulum miyakonense HT12	1	0	0	0	1
GCF_000421465.1	Methylohalobius crimeensis 10Ki	1	0	0	0	1
GCF_000424685.1	Methylococcus capsulatus str. Texas = ATCC 19069	1	0	0	0	1
GCF_000427385.1	Methylocaldum szegediense O-12	1	0	0	1	1
GCF_000427625.1	Methylobacter luteus IMV-B-3098	1	0	0	1	1
GCF_000496735.2	Methyloglobulus morosus KoM1	1	0	0	0	1
GCF_000515215.1	Methylomonas sp. 11b	1	0	0	0	1
GCF_000527095.1	Methylomicrobium lacus LW14	1	0	0	0	1
GCF_000685925.1	Methylobacter tundripaludum 21/22	1	0	0	0	1
GCF_000733835.1	Methylobacter tundripaludum 31/32	1	0	0	0	1
GCF_000733855.1	Methylomicrobium agile ATCC 35068	1	0	0	0	1
GCF_000733935.1	Methylomarinum vadi IT-4	1	0	0	0	1
GCF_000746145.1	Methylobacter sp. BBA5.1	1	0	0	1	1
GCF_000785705.2	Methylomonas denitrificans FJG1	1	0	0	0	1
GCF_000934725.1	Methyloterricola oryzae 73a	1	0	0	0	1
GCF_000963695.1	Methylocucumis oryzae Sn10-6	1	0	0	0	1
GCF_000968535.2	Methylotuvimicrobium alcaliphilum 20Z	1	0	0	0	1
GCF_001312345.1	Methylogaea oryzae JCM 16910	2	0	0	0	0
GCF_001644015.1	Methylomonas lenta R-45370	1	0	0	0	1
GCF_001644025.1	Methylomonas koyamae R-45383	1	0	0	1	1
GCF_001644035.1	Methylomonas methanica R-45363	1	0	0	0	1
GCF_001644045.1	Methylomonas methanica NCIMB 11130	1	0	0	0	1
GCF_001644095.1	Methylomonas koyamae R-49807	1	0	0	0	1
GCF_001644115.1	Methylomonas methanica R-45371	1	0	0	0	1
GCF_001644135.1	Methylomonas koyamae R-45378	1	0	0	0	1
GCF_001644685.1	Methylomonas sp. DH-1	1	0	0	0	1
GCF_001856095.1	Methylomonas sp. LWB	1	0	0	1	1
GCF_002005105.1	Methylocaldum sp. 14B	1	0	0	3	1
GCF_002072955.1	Methyloprofundus sedimenti WF1	1	0	0	0	1
GCF_002209385.1	Methylovulum psychrotolerans HV10_M2	1	0	0	1	1
GCF_002441955.1	Methylomonas koyamae LM6	1	0	0	0	1
GCF_002834115.1	Methylomonas sp. Kb3	1	0	0	0	1
GCF_002923755.1	Methylovulum psychrotolerans Sph1	1	0	0	1	1
GCF_002934365.1	Methylobacter tundripaludum OWC-G53F	1	0	0	0	1
GCF_002934385.1	Methylobacter tundripaludum OWC-DMM	1	0	0	0	1
GCF_003584645.1	Methylocaldum marinum S8	1	0	0	2	1
GCF_003994235.2	Candidatus Methylobacter oryzae KRF1	1	0	0	0	1
GCF_004343025.1	Methylomonas methanica S-1	1	0	0	0	1
GCF_005931095.1	Methylotuvimicrobium buryatense 5GB1C	1	0	0	0	1
GCF_006175985.1	Methylotetracoccus oryzae C50C1	1	0	0	0	1
GCF_006483455.1	Methylomonas koyamae SM2	1	0	0	0	1
GCF_008632455.1	Methylomonas rhizoryzae GJ1	1	0	0	0	1
GCF_009498235.1	Candidatus Methylospira mobilis Shm1	1	0	0	0	2
GCF_009828925.2	Methylicorpusculum oleiharenae XLMV4	1	0	0	0	1
GCF_012769535.1	Methylococcus geothermalis IM1	1	0	0	0	1
GCF_013141865.1	Methylomonas sp. ZR1	1	0	0	0	1
GCF_014850955.1	Methylomonas albis EbA	1	0	0	2	1
GCF_014850975.1	Methylomonas fluvii EbB	1	0	0	0	1
GCF_015476545.1	Methylobacter sp. BlB1	1	0	0	0	1
GCF_015711015.1	Methylomonas sp. LL1	1	0	0	1	1
GCF_016106025.1	Methylococcus sp. BF19-07	1	0	0	0	1
GCF_016745425.1	Methylomicrobium sp. RS1	1	0	0	1	1
GCF_016865255.1	Methylomonas sp. LW13	1	0	0	0	1
GCF_016925495.1	Methylococcus sp. EFPC2	1	0	0	1	2
GCF_016925515.1	Methylomonas sp. EFPC1	1	0	0	0	1
GCF_017832375.1	Methylocaldum sp. RMAD-M	1	0	0	3	1
GCF_018722605.1	Methylovulum psychrotolerans S1L	1	0	0	0	1
GCF_018734325.1	Methylomonas paludis S2AM	1	0	0	1	1
GCF_019285515.1	Methylococcus sp. Mc7	1	0	0	0	1
GCF_019285535.1	Methylococcus capsulatus BH	1	0	0	0	1
GCF_019285555.1	Methylococcus capsulatus KN2	1	0	0	0	1
GCF_019285575.1	Methylococcus capsulatus IO1	1	0	0	0	1
GCF_019669905.1	Methylomonas koyamae Fw12E-Y	1	0	0	0	1
GCF_019669985.1	Methylogaea oryzae E10	1	0	0	0	1
GCF_019670005.1	Methylomagnum ishizawai RS11D-Pr	1	0	0	1	1
GCF_022788635.1	Methylobacter sp. S3L5C	1	0	0	0	1
GCF_023370095.1	Methylococcus capsulatus MIR	1	0	0	0	1
GCF_024360925.2	Methylomonas rapida MP1	1	0	0	0	1
GCF_024505045.1	Methylomonas sp. SURF-1	1	0	0	0	1
GCF_024505055.1	Methylomonas sp. WSC-7	1	0	0	0	1
GCF_024505165.1	Methylomonas sp. WSC-6	1	0	0	0	1
GCF_024505185.1	Methylomonas sp. SURF-2	1	0	0	0	1
GCF_025583945.1	Methylobacter psychrophilus Z-0021	1	0	0	0	1
GCF_026247885.1	Methylococcus mesophilus 16-5	1	0	0	0	1
GCF_026727675.1	Methylobacter sp. YRD-M1	1	0	0	1	1
GCF_029478315.1	Methylococcus capsulatus VKPM-B-12549	1	0	0	0	1
GCF_029643245.1	Methylomonas sp. EFPC3	1	0	0	0	1
GCF_029910655.1	Methylomonas sp. UP202	1	0	0	1	1
GCF_030490285.1	Methylomonas montana MW1	1	0	0	0	1
GCF_030717995.1	Methylomarinum sp. Ch1-1	1	0	0	0	1
GCF_031582845.1	Methylomonas koyamae MY1	1	0	0	0	1
GCF_032142695.1	Methylomonas sp. MV1	1	0	0	1	1
GCF_032142715.1	Methylomonas sp. MO1	1	0	0	0	1
GCF_032390415.1	Candidatus Methylospira mobilis SPMX	1	0	0	0	2
GCF_900155475.1	Methylomagnum ishizawai 175	1	0	0	0	1
GCF_900163745.1	Crenothrix polyspora RSM_CP2	0	0	0	0	1
GCF_900163755.1	Crenothrix polyspora RSM_CP1	1	0	0	0	1
GCF_902806695.1	Candidatus Methylobacter favarea METHB21	0	0	0	0	1
GCF_903064685.1	Methylomonas fluvii ElbeB	1	0	0	0	1
GCF_903064715.1	Methylomonas albis ElbeA	1	0	0	2	1
GCF_949769275.1	Methylococcus capsulatus Mc(Nor)	1	0	0	0	1

## Sheet: Verruco
Genome Accession	Complete name with strain	mxaF	xoxF1	xoxF2	xoxF3	xoxF5
GCF_000019665.1	Methylacidiphilum infernorum V4	0	0	1	0	0
GCF_000297415.1	Methylacidiphilum fumariolicum SolV	0	0	1	0	0
GCF_000817245.1	Methylacidiphilum kamchatkense Kam1	0	0	1	0	0
GCF_004421155.1	Candidatus Methylacidiphilum fumarolicum Rib	0	0	1	0	0
GCF_004421165.1	Candidatus Methylacidiphilum fumarolicum Ice	0	0	1	0	0
GCF_004421175.1	Candidatus Methylacidiphilum fumarolicum Fdl	0	0	1	0	0
GCF_004421185.1	Methylacidiphilum sp. Yel	0	0	1	0	0
GCF_004421195.1	Candidatus Methylacidiphilum fumarolicum Fur	0	0	1	0	0
GCF_004421255.1	Methylacidiphilum caldifontis Phi	0	0	1	0	0
GCF_017310505.1	Methylacidiphilum caldifontis IT6	0	0	1	0	0
GCF_017310525.1	Candidatus Methylacidiphilum infernorum IT5	0	0	1	0	0
GCF_017310545.1	Methylacidimicrobium sp. B4	0	1	1	0	0
GCF_019429645.1	Candidatus Methylacidiphilum fumarolicum Pic	0	0	1	0	0
GCF_902143375.2	Methylacidimicrobium tartarophylax 4A	0	1	1	0	0
GCF_902143385.2	Methylacidimicrobium cyclopophantes 3B	0	1	1	0	0
GCF_903064525.1	Methylacidimicrobium sp. AP8	0	1	1	0	0
GCF_949774925.1	Candidatus Methylacidiphilum fumarolicum	0	0	1	0	0

## Sheet: Synthesis
MOBs	Total MOB genomes	mxaF	XoxF1	XoxF2	XoxF3	XoxF5	LanA	LanM	LanP	LutH
Alphaproteobacteria	60	54	7	0	24	104	2	62	0	65
Gammaproteobacteria	101	100	0	0	29	103	83	0	79	126
Verrucomicrobia	17	0	4	17	0	0	0	0	3	18
Actinomycetes	1	0	0	0	0	0	0	0	0	0
		154	11	17	53	207	85	62	82	209
