# Supplementary material for: Diversity and distribution of the lanthanome in aerobic methane-oxidising bacteria
Source: Research Square preprint supplement (doi:10.21203/rs.3.rs-6350491/v1), 2025-05-22
Supplement: Supplementary file 3 [file b9954b094c499f944a3ea243.docx]

**Supplementary Information**

**Diversity and distribution of the lanthanome in aerobic methane-oxidising bacteria**

Shamsudeen Umar Dandare1,2, Alexander Allenby1, Eleonora Silvano3,4, Peter Nockemann5, Yin Chen4, Thomas J Smith6, Deepak Kumaresan1,4

Contents:

- Tables S1-S5
- Figures S1-S5

**Supporting Tables**

**Table S1:** MOB custom database including complete names, genome accession numbers, isolation source, genome completeness and contamination assessed by checkM and NCBI taxonomy for genomes included in the comparative study.

**Table S2:** Specific query sequences used for BLAST searches for lanthanide-dependent transporters in plasmids and lake sediment metatranscriptomes within IMG.

| **Name** | **Sequence** | **Reference** |
| --- | --- | --- |
| Lanmodulin (LanM) | MAFRLSSAVLLAALVAAPAYAAPTTTTKVDIAAFDPDKDGTIDLKEALAAGSAAFDKLDPDKDGTLDAKELKGRVSEADLKKLDPDNDGTLDKKEYLAAVEAQFKAANPDNDGTIDARELASPAGSALVNLIR | Cotuvo et al., 2018  [5] |
| LanPepsy (LanP) | MVGKTLVVLSTFALAISSSLAIADHHFPKGKVSLETCLEAALKAKPGTVVKVEYKLEGETPVYEFDIESSDSTAWDVECDANTGKIVEIEQEVDSADHPLFKAKQKVSEAEARKTALAAHPGEIVEVEYEIEENGAASYEFDIKTKDGKEFKVEVDASTGKIVEANQEFYQIGKE | Hemmann et al., 2023  [10] |
| TonB-dependent receptor (LanA) | MSLTSIIKIESNQNATGSGQGQIAPFRMCLMTVAVLAAVNANAAKVDDRPPAVKLPPLEIIGEEPSQLEHIPGSGFVIDKTTLDRQGPLSTKDALRTIPGIHIVDEDVLGRRFNLGIRGLDPRRSVRTQLLEDGAPIQLAPYSDPSNHYIPTNKRIDRIEVLKGSGQIMYGPQTVGGAVNFVSAPIPEEFGGSISAAGGNNGYYDTHLRLGGTLDNVGLSLDYIRQESDGNRSGQHQEVDDLALKALIKIDDRQRLMLKGILTHEDADMGEAGLTSEMYRRNQRTNPLRNDSFEVRRYAGQALYEFDISDTMQFSTNIYGNHMFRESIRQANDSSQMNNCANRREPISADVAPTCGNEQRPRTYNVFGIEPKLVFMHDAFGLQSETTLGIRGHFEWADRERYVGNAGPRDTTQGRENNNHGRNRYQDNSLETQALSFFAQNRFFLGDFTVTPGVRVEHYYQDNINNIDGATESLVRTEALPGVGVTYNGIDNTTLFAGVHRGFAPGRIGDFVDPTKNILSQVEPELSLNYEAGVRTSPTPGVNLEMTYFRIDFENQIVEDITVEDTRFVNVGETVHQGVETGFRLDSNQLFGTDYNYYLTTSYTYLDAYFASNEARAGIVRDNRLPYAPEHLINANVGVETPWGLDIRFGIQSVSQQYVDIENTREENANGQEGIIPGYTVFNVSANYQVVKNVNVFMNGYNLSDKKFIASRVDGIHPGQGFQMMGGVKWTF | Groom et al., 2019  [6] |
| TonB-dependent receptor (LutH) | MLGSRSRISLIALLAAATASHAARAQEALPDIEIATAPEPGAKVTQSKLSTNPIILTRSDLDRDHAVSITDTLLRRNASISSSEVAGNPFQPDISYRGFSASPVPGTPQGLAVYQDGVRINEAFGDSVNFDLIPTVAIANGDIVSGNPMFGLNALGGALTLEMKNGFTWQGVEVDGRGGSYGRRFGSVQYGQKFDDLAVYLAFEGLGERGWRKRSGSSLLRGYGDIGYKGDKTEFHLNFTGAGTRLGNAAATPVEMLERQYNSVFTTPQSSNNDLLFVNLKGAYEADAHLKFNGNTYFRQFRQQHVDGNLADVEECGSDEQWLCQETDGFANEPSFQQSVLRDGNGKRIPSSVLNGAGVGSIDYTRVNSRSYGFALQGTYDAPVFGFANKLIVGASHDRQHSDFRGYSELGILNGNLAVGGTGLLYSNLVPEGGFQPVHVGGRNFYWGVYAHDTLEVTDKLTATAGLRFNSADIALFDHRGVSLNSAALYQRVNPVAGLTYTFLPELTVYGNYSEANRAPTALENGCSDRLHPCMIDNFLVSDPPLRQVVARTWETGLRGHHEFGGDYGRADWHAGLFRTDSADDILSLPSDVIQGRGYYANVGHTRRQGVEAGVTWRNDFLQVYADYALIDATFRSFLTLNSGDNPYADENGQIHVHPGNVLPSIPRHRVKVGFDYKVTPQWTFGLDYIFRTGVHLAGDEANLDRPLSSYGIVNLKTSYKVTDNIEIYSVVQNLFDRRYYSFGTYFETGSEAIGFLGLTDPRTLGPGAPLAAYGGVKVRF | Shiina et al., 2023  [7] |

**Table S3:** The composition of the concentrated ore

| **S/N** | **Rare earth element** | **Mass (%)** |
| --- | --- | --- |
| 1 | Lanthanum (La) | 16.6 |
| 2 | Cerium (Ce) | 37.3 |
| 3 | Praseodymiun (Pr) | 4.35 |
| 4 | Neodenyum (Nd) | 17.2 |
| 5 | Samarium (Sm) | 2.57 |
| 6 | Europium (Eu) | 0.13 |
| 7 | Gadolinium (Gd) | 2.12 |
| 8 | Terbium (Tb) | 0.31 |
| 9 | Dysprosium (Dy) | 1.74 |
| 10 | Holmium (Ho) | 0.34 |
| 11 | Erbium (Er) | 0.87 |
| 12 | Thulium TM | 0.12 |
| 13 | Ytterbium (Yb) | 0.58 |
| 14 | Lutetium (Lu) | 0.07 |
| 15 | Yttrium (Y) | 8.34 |
| 16 | Scandium (Sc) | 0.01 |

**Table S4:** Distribution of methanol dehydrogenase and lanthanide-dependent genes in methane-oxidising bacteria.

**Table S5:** Proteomics response of *Methylosinus trichosporium* OB3b to cerium and mixed lanthanide ore.

**Supporting Figures**

**
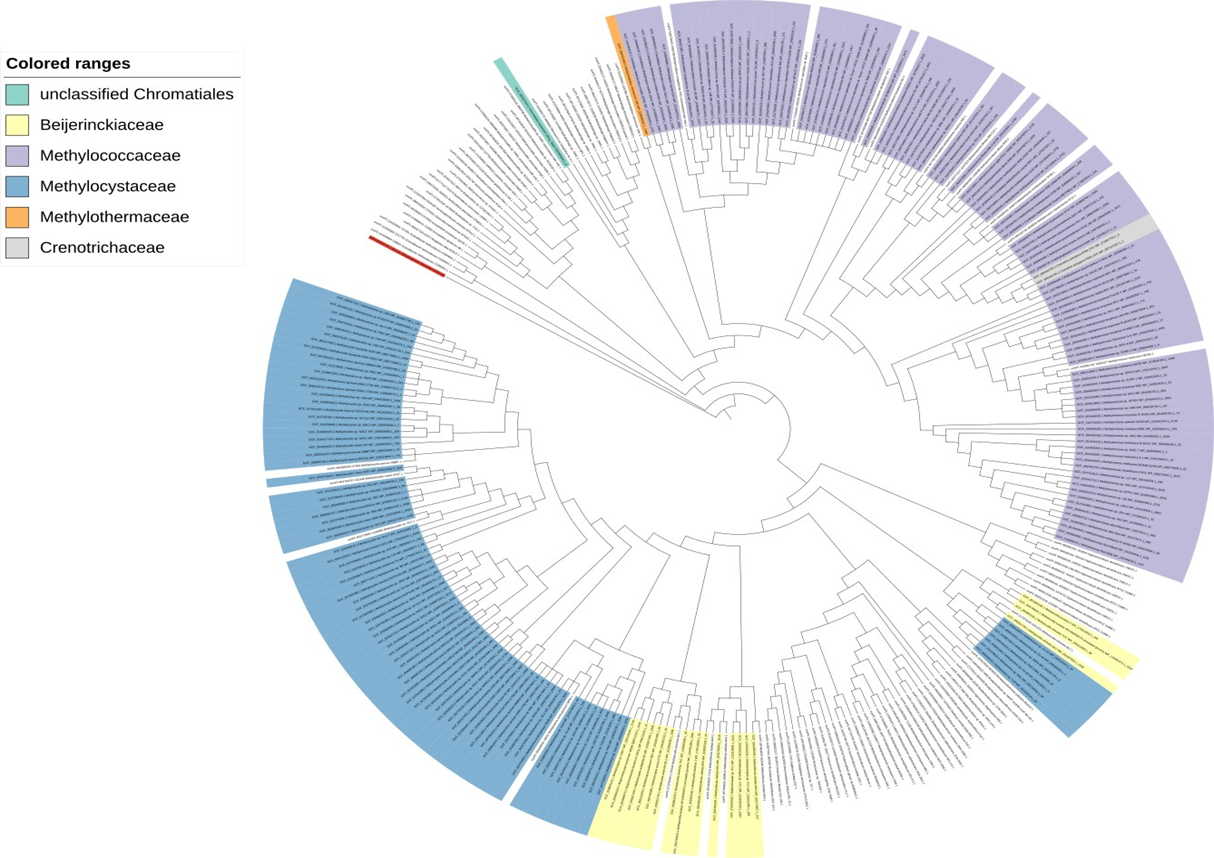
**

**Figure S1:** Circular phylogenetic tree showing XoxF5 hits from MOB genome database. The dark red colored leaf is a glucose dehydrogenase used as an outlier. Leaves without colored ranges are references.

**
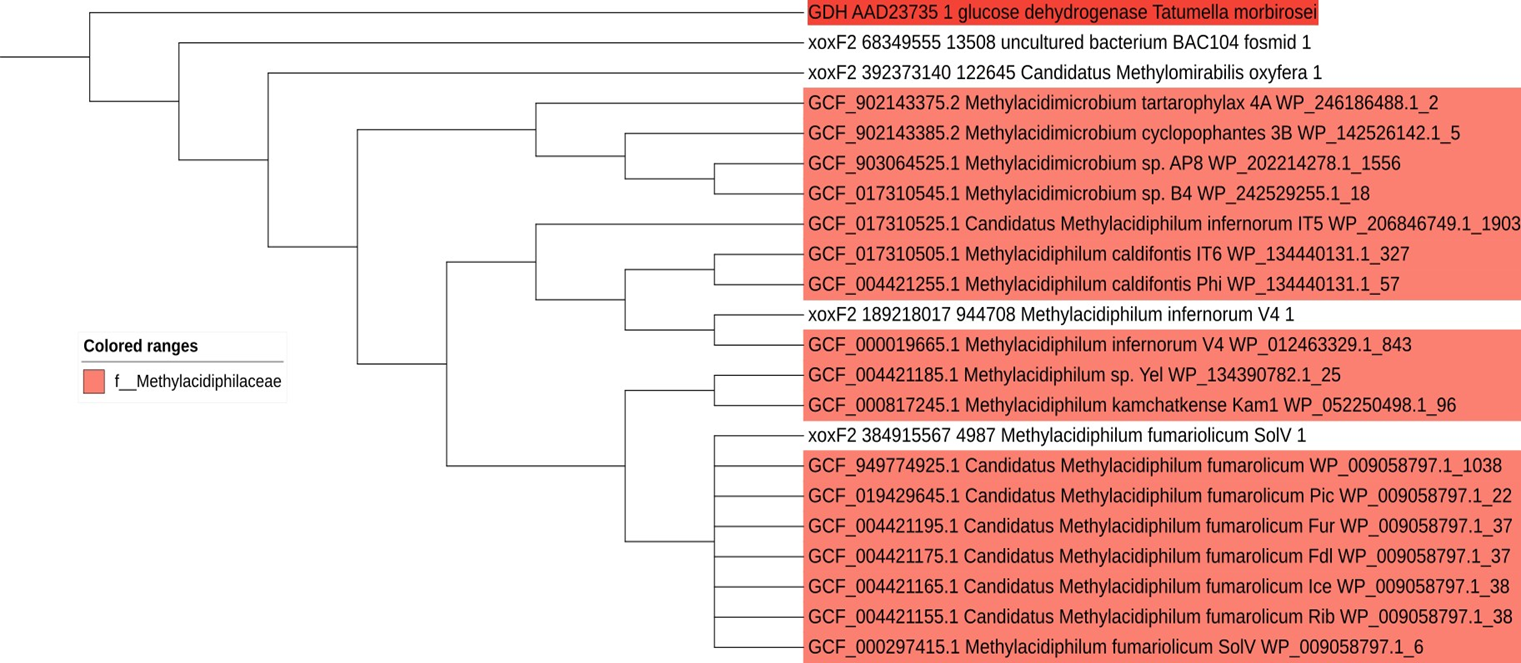
**

**Figure S2:** Rectangular phylogenetic tree showing XoxF2 hits from MOB genome database. The dark red colored leaf is a glucose dehydrogenase used as an outlier. Leaves without colored ranges are references.

**
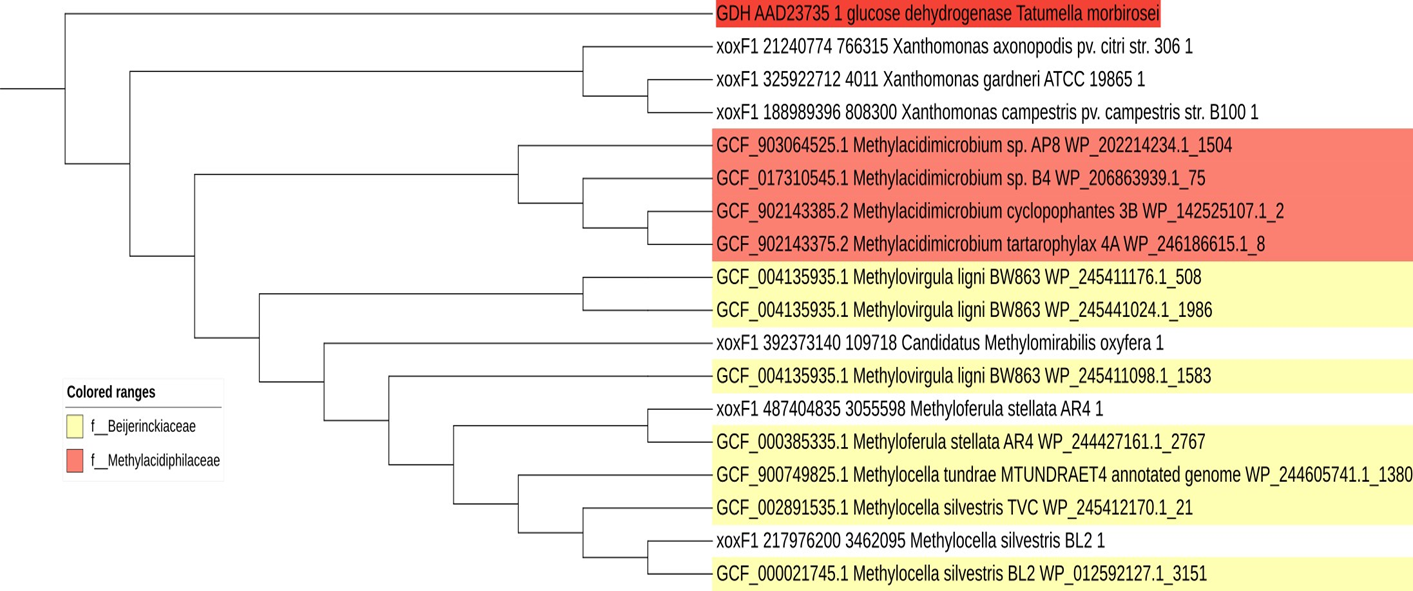
**

**Figure S3:** Rectangular phylogenetic tree showing XoxF1 hits from the MOB genome database. The dark red colored leaf is a glucose dehydrogenase used as an outlier. Leaves without colored ranges are references.

**
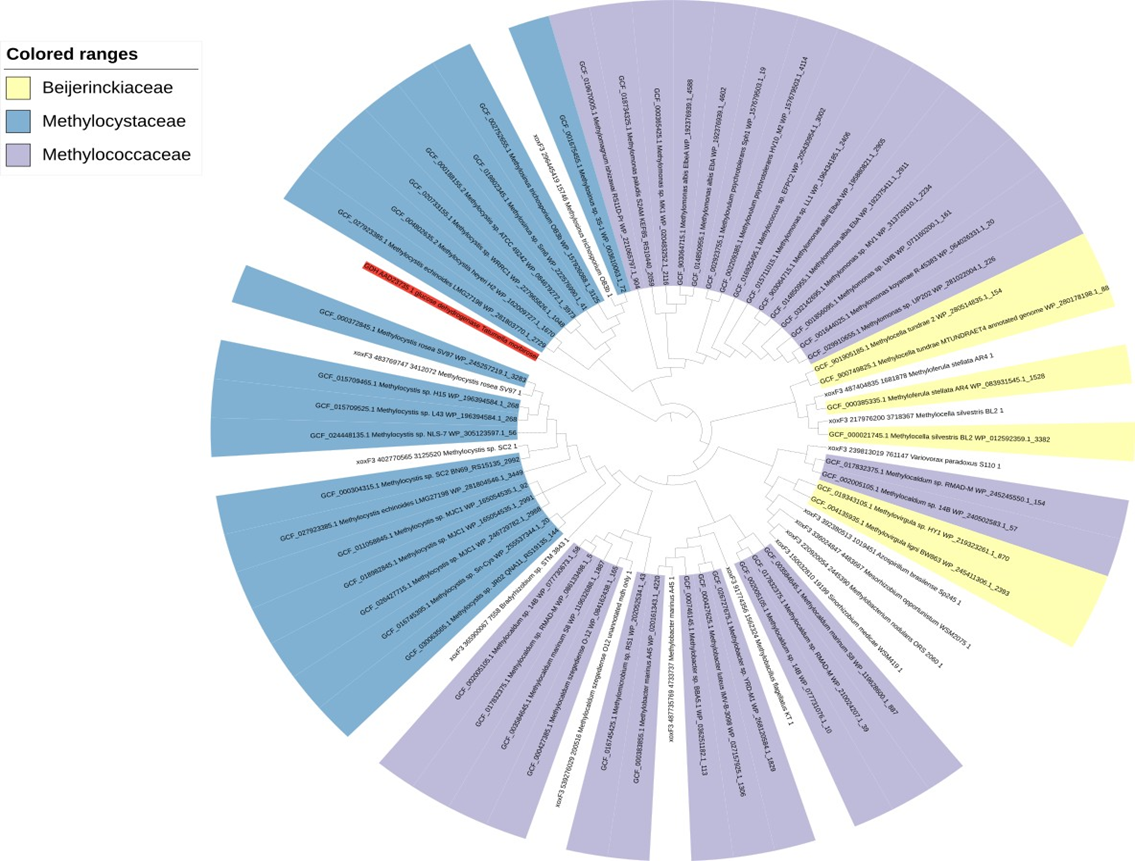
**

**Figure S4:** Circular phylogenetic tree showing XoxF3 hits from MOB genome database. The dark red colored leaf is a glucose dehydrogenase used as an outlier. Leaves without colored ranges are references.

**
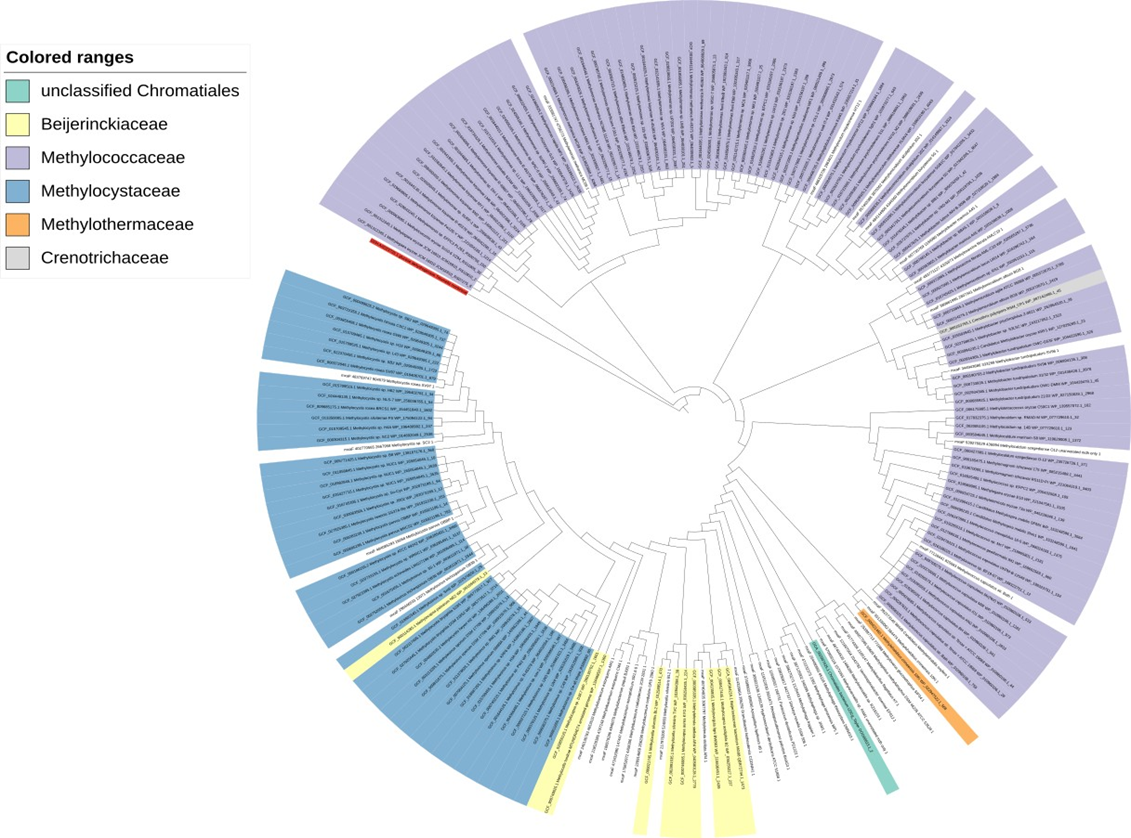
**

**Figure S5:** Circular phylogenetic tree showing MxaF hits from MOB genome database. The dark red colored leaf is a glucose dehydrogenase used as an outlier. Leaves without colored ranges are references.
